# Supplementary material for: Solute effects on the dynamics and deformation of emulsion droplets during freezing
Source: Royal Society of Chemistry journal article supplement (doi:10.1039/d2sm00226d), 2022-01-01
Supplement: d2sm00226d1.pdf [file d2sm00226d1.pdf]

## Supplementary Information

Solute effects on dynamics and deformation of emulsion droplets during  
freezing

*Sidhanth Tyagi, Cécile Monteux, and Sylvain Deville*

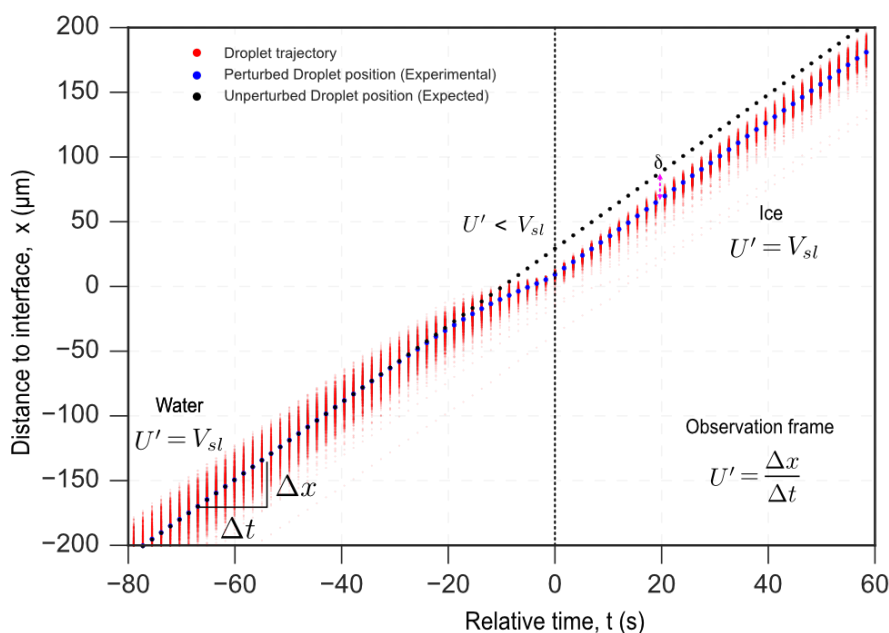

Figure S1: **Measurement of interaction time and apparent droplet velocity  $U'$  in the observation frame.** In the observation frame, far from the solid-liquid interface in water the droplet moves at the imposed growth rate  $U' = Dx/Dt = V_{sl}$ , as the droplet approaches the interface it gets repelled  $U' \neq V_{sl}$ , and as the droplet is engulfed in the ice it doesn't get repelled anymore, thereby recovering  $U' = V_{sl}$ . The interaction time is the total duration over which a droplet gets repelled by the solidification interface. Relative time is zero when the front edge of the droplet hits the solidification front. Experimental conditions for which the curve was recorded:  $V_{sl} = 3 \mu\text{m} \cdot \text{s}^{-1}$ ,  $G = \nabla T = 10^4 \text{ K} \cdot \text{m}^{-1}$ , Droplet size  $R_1 = 7.2 \pm 0.4 \mu\text{m}$ . © (2020) S. Tyagi *et al.* (10.6084/m9.figshare.14815083) CC BY 4.0 license <https://creativecommons.org/licenses/by/4.0/>.

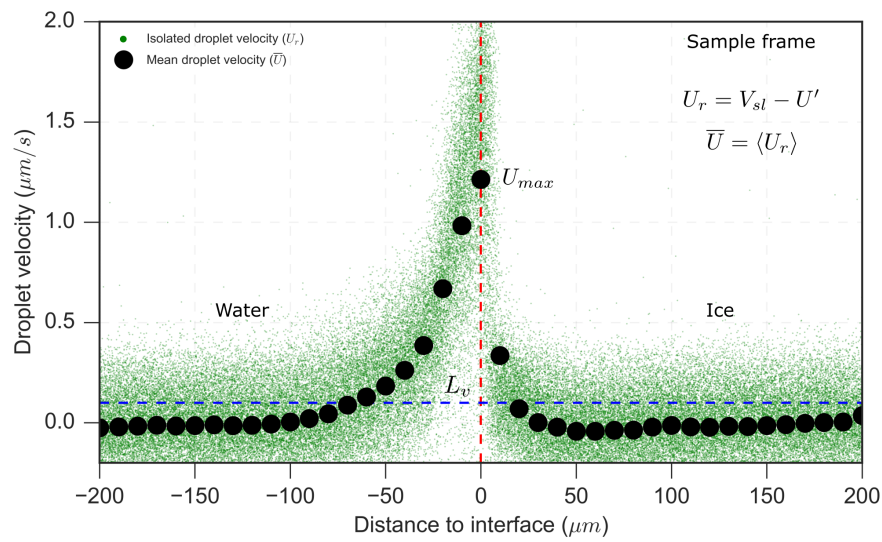

Figure S2: **Deducing the isolated droplet velocity  $U_r$  and the mean droplet velocity  $\bar{U}$  in the sample frame.** In the sample frame, the isolated droplet velocity  $U_r$  is zero far from the interface, it increases and reaches a maximum when the droplet gets repelled by the interface and subsequently, reduces to zero as the droplet is engulfed in the ice. Experimental conditions for which the curve was recorded:  $V_{sl} = 3 \mu m \cdot s^{-1}$ ,  $G = \nabla T = 10^4 K \cdot m^{-1}$ , Droplet size  $R_1 = 7.2 \pm 0.4 \mu m$ . © (2020) S. Tyagi *et al.* (10.6084/m9.figshare.14815083) CC BY 4.0 license <https://creativecommons.org/licenses/by/4.0/>.
